# Supplementary material for: MAPT R406W increases tau T217 phosphorylation in absence of amyloid pathology
Source: PubMed Central journal article supplement — Ann Clin Transl Neurol. 2021 Aug 2;8(9):1817–30. doi: 10.1002/acn3.51435 (PMC8419397; doi:10.1002/acn3.51435), 2021-08-02
Supplement: ACN3-8-1817-s001.pdf [file ACN3-8-1817-s001.pdf]

## Supplementary Figures and Tables

### ~~Tau Phosphorylation at T217 Increases in *MAPT* R406W Mutation Carriers without Amyloid Pathology~~

Chihiro Sato\*\*, Nipun Mallipeddi, Nupur Ghoshal, Brenton A. Wright, Gregory S. Day, Albert A. Davis, Albert H. Kim, Gregory J Zipfel, Randall J. Bateman, Audrey Gabelle\*\*, and Nicolas R. Barthélemy\*\*

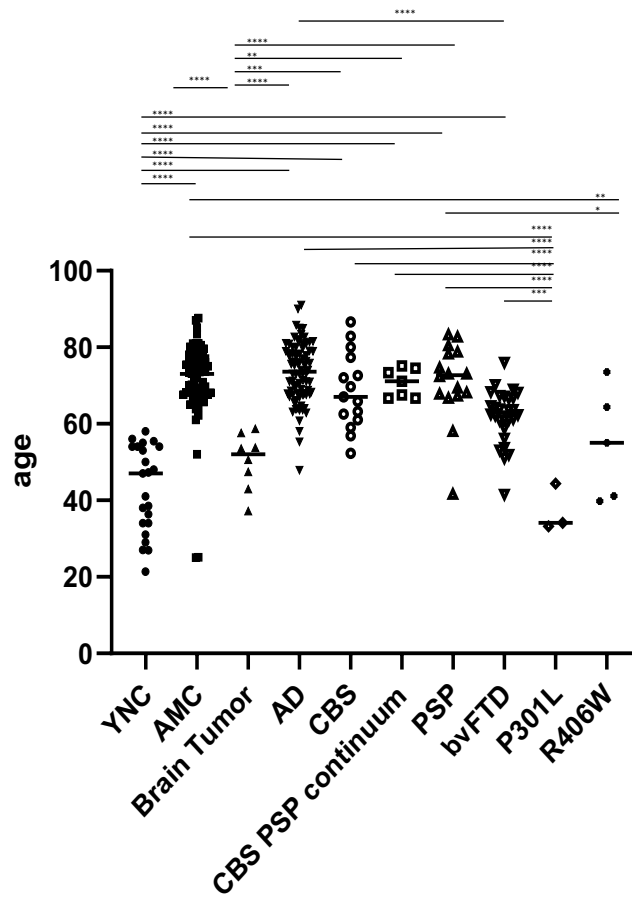

**Supplementary Fig. 1. Age of the participants in each subgroup.** YNC, Brain tumor, P301L groups are significantly younger than AMC and participants with neurodegenerative diseases.

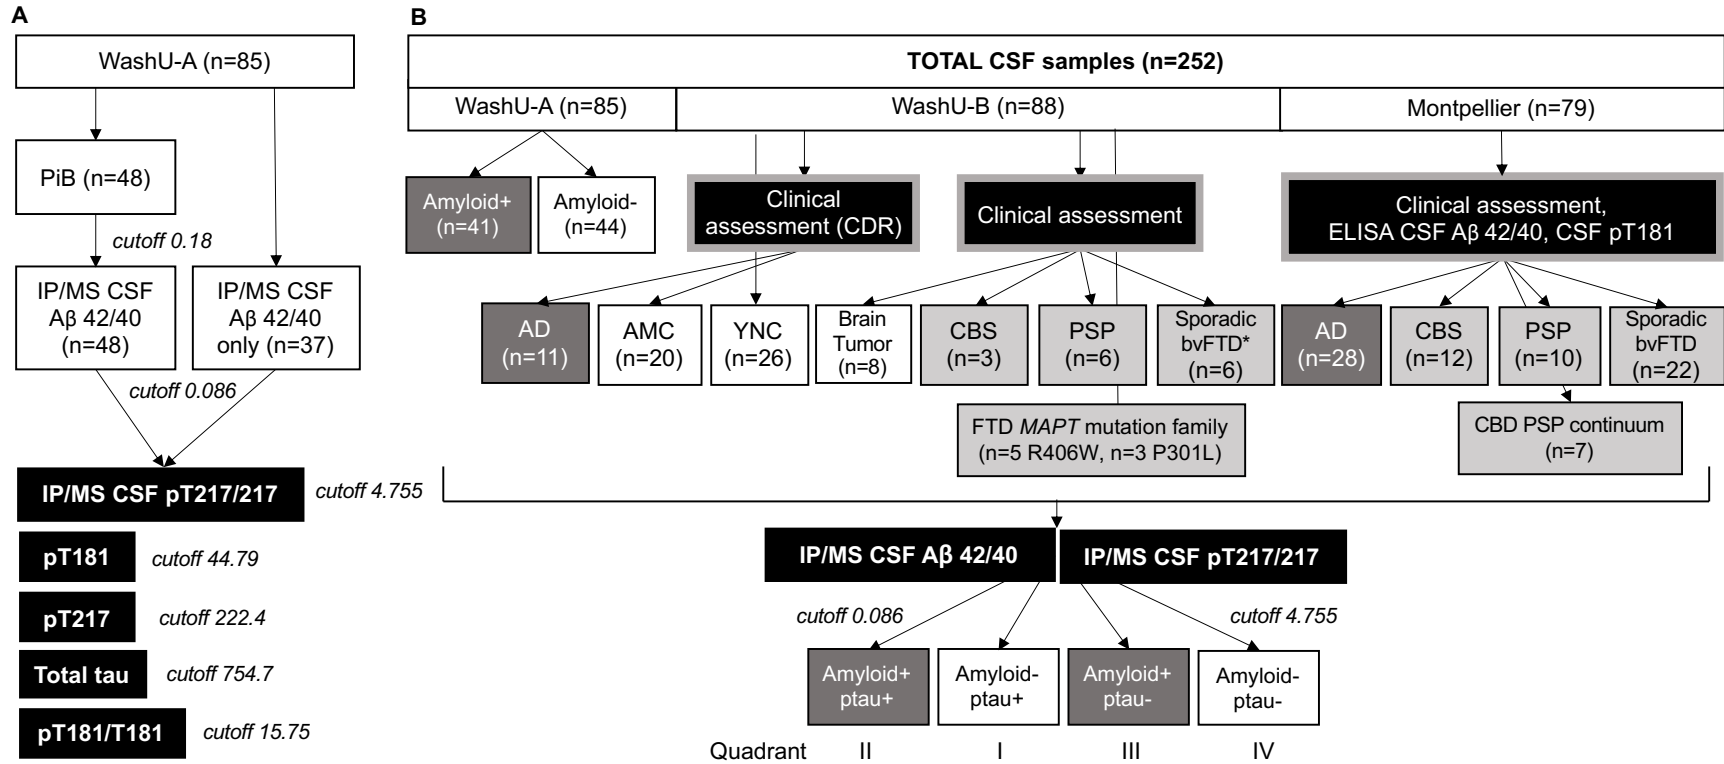

**Supplementary Fig. 2. Flowchart of cohort analyzed in this study.** (A) WashU-A cohort includes AD and age matched controls with a subset (n=48) having PiB PET imaging data. This subset and a PiB PET cutoff of 0.18 were used to determine amyloid positivity of immunoprecipitation and Mass spectrometry (IP/MS) measures of CSF A $\beta$  42/40 (cutoff 0.086). Next, all CSF from WashU-A was used to determine IP/MS CSF pT217/T217 cutoff of 4.76. Cutoff of CSF concentrations of pT181, pT217, total tau, and ratio of pT181/T181 were 44.79, 222.4, 754.7, and 15.75, respectively. (B) WashU-A (n=85), WashU-B (n=88), and Montpellier cohort (n=79) were analyzed for IP/MS CSF A $\beta$  42/40 and pT217/T217 in quadrant analyses (total n=252). Samples were categorized into quadrant

I-IV using the cutoffs for amyloid and ptau positivity determined in (A). AMC: age matched control, YNC: Young Normal Control, CBS: Corticobasal Syndrome, PSP: Progressive Supranuclear Palsy, bvFTD: behavioral variant Frontotemporal Dementia.

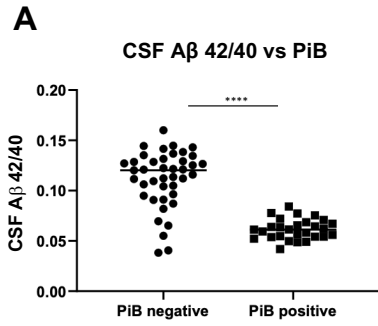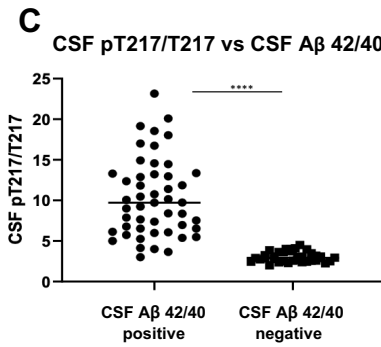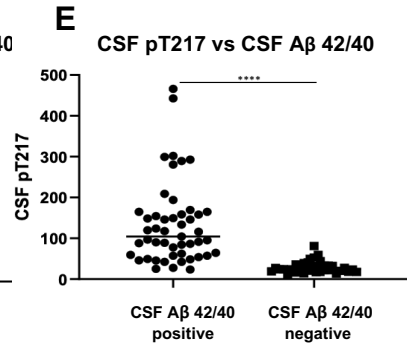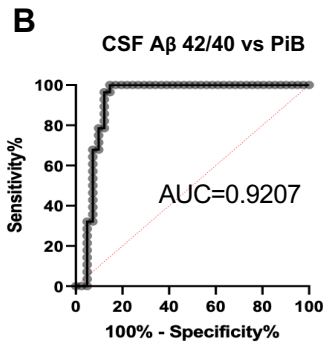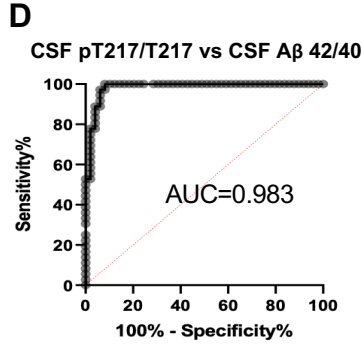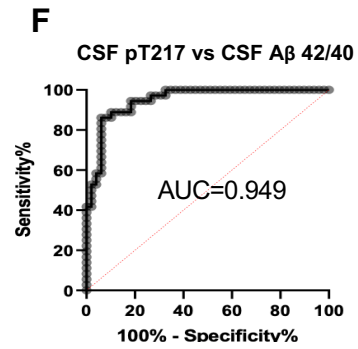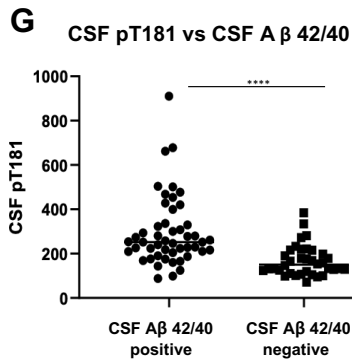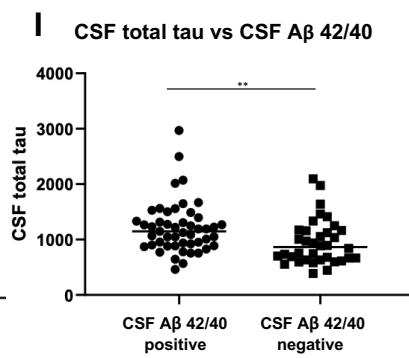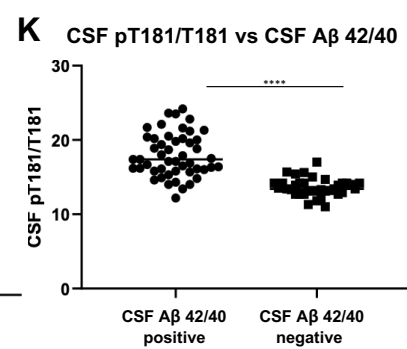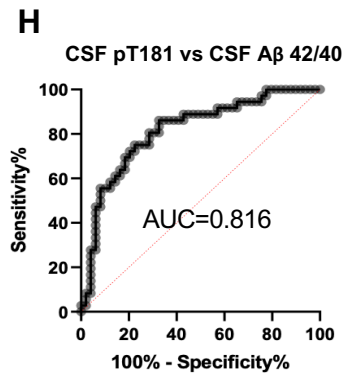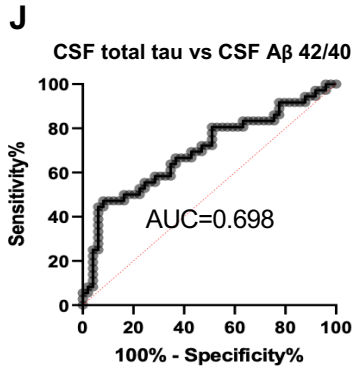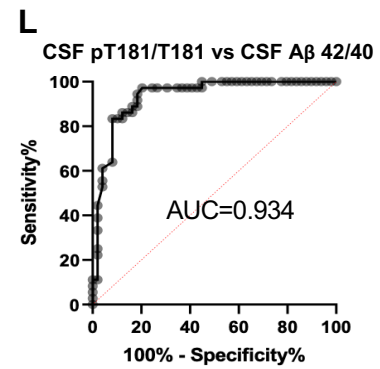

**Supplementary Fig. 3. ROC analyses of IP/MS CSF A $\beta$  42/40, CSF tau and ptau.** (A) CSF A $\beta$  42/40 ratio is significantly increased in amyloid PET-PiB+ participants in Wash-A cohort (n=48). (B) CSF A $\beta$  42/40 can differentiate amyloid PET-PiB+ from PiB- individuals (AUC = 0.9207, p<0.0001). (C, E, G, I, K) CSF pT217/T217 ratio, CSF pT217, CSF T181, CSF total tau concentrations, CSF pT181/T181 ratio are significantly increased in amyloid+ participants defined by CSF A $\beta$  42/40 ratio in Wash-A cohort (n=85). (D, F, H, J, L) CSF pT217/T217 ratio, CSF pT217, CSF T181, CSF total tau concentrations, CSF pT181/T181 ratio can differentiate CSF A $\beta$  42/40 positive (amyloid +) from CSF A $\beta$  42/40 negative (amyloid -) individuals with AUC = 0.983, 0.949, 0.816, 0.693, 0.934, respectively. \*p<0.05, \*\*p<0.01, \*\*\*p<0.001, \*\*\*\*p<0.0001.

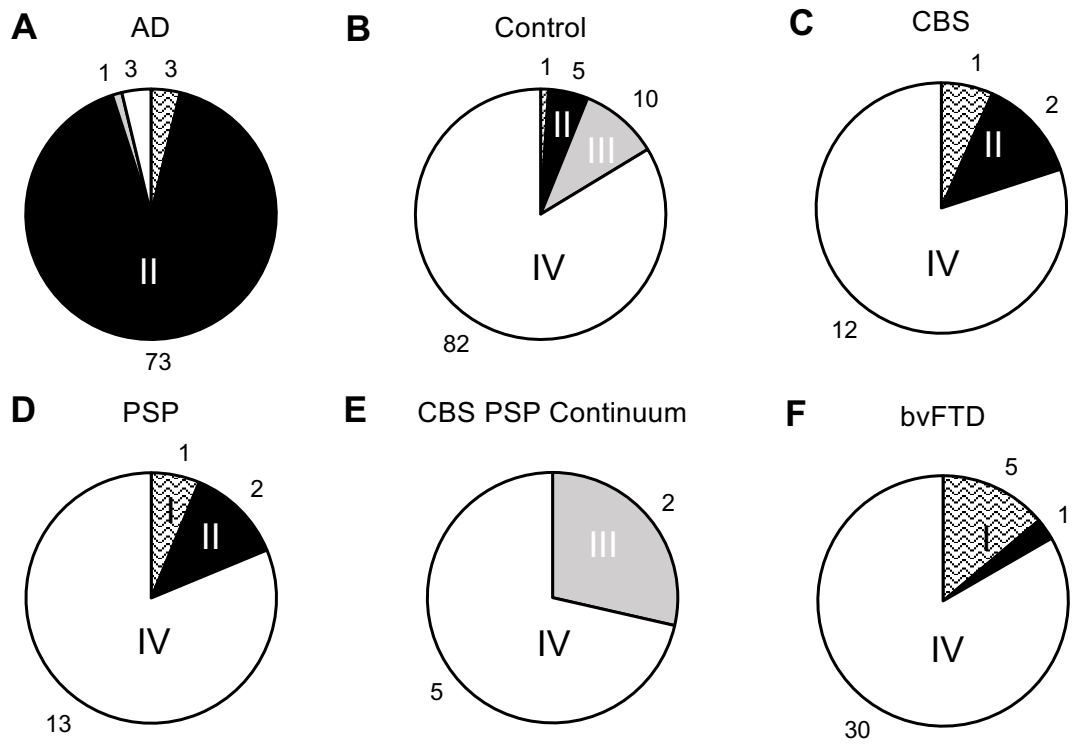

**Supplementary Fig. 4. Quadrant analyses by diagnosis.** Pie charts showing the quadrants (I, II, III, IV) where participants from each disease group are located.

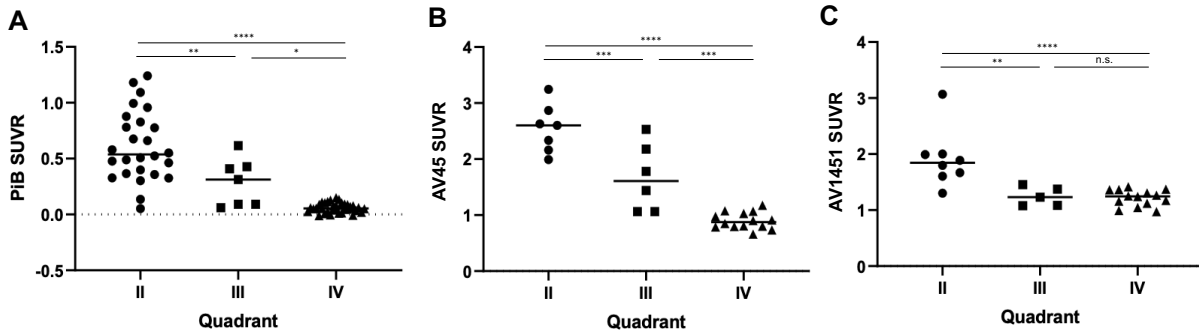

**Supplementary Fig. 5. Amyloid and tau PET Imaging by quadrant.** (A) Amyloid PET imaging measured by PiB SUVR is significantly and gradually increased in quadrant II > III > IV (ANOVA,  $p < 0.0001$ ). (B) Amyloid PET imaging measured by AV45 SUVR is significantly and gradually increased in quadrant II > III > IV (ANOVA,  $p < 0.0001$ ). (C) Tau PET imaging measured by AV1451 SUVR is only increased in quadrant II (ANOVA,  $p < 0.0001$ ). There was no participant with imaging data in quadrant I. ANOVA \* $p < 0.05$ , \*\* $p < 0.01$ , \*\*\* $p < 0.001$ , \*\*\*\* $p < 0.0001$ .



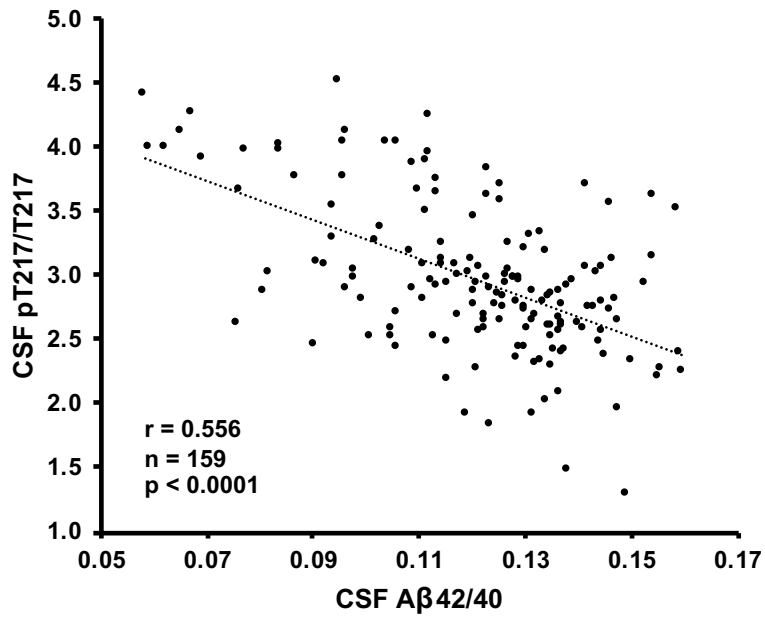

**Supplementary Fig. 6. CSF Aβ 42/40 and CSF pT217/T217 correlate in quadrant III and IV.**

CSF pT217/T217 negatively correlates with CSF Aβ 42/40 in quadrant III and IV below cutoff for ptau positivity (Pearson correlation  $r=0.556$ ,  $p<0.0001$ ).

| Participant | Quadrant | Diagnosis / groups | Age | Sex | CSF A $\beta$ 42/40<br>(Cutoff = 0.086) | CSF pT217/T217<br>(Cutoff = 4.76) | CSF pT217/T217 x<br>CSF A $\beta$ 42/40<br>(Cutoff for R406W vs<br>control = 0.50) | CSF pT217/T217<br>div CSF A $\beta$ 42/40<br>(Cutoff for R406W vs control =<br>39.9) |
|-------------|----------|--------------------|-----|-----|-----------------------------------------|-----------------------------------|------------------------------------------------------------------------------------|--------------------------------------------------------------------------------------|
| A           | I        | PSP                | 57  | M   | 0.127                                   | 6.107                             | 0.776                                                                              | 48.1                                                                                 |
|             | I        | PSP                | 58  |     | 0.137                                   | 7.259                             | 0.992                                                                              | 53.1                                                                                 |
| B           | IV       | CBS                | 58  | M   | 0.123                                   | 3.116                             | 0.385                                                                              | 25.2                                                                                 |
|             | IV       | CBS                | 59  |     | 0.105                                   | 2.515                             | 0.265                                                                              | 23.9                                                                                 |
| C           | IV       | CBS                | 66  | F   | 0.127                                   | 2.977                             | 0.378                                                                              | 23.5                                                                                 |
|             | IV       | CBS                | 67  |     | 0.123                                   | 3.832                             | 0.473                                                                              | 31.1                                                                                 |
| D           | IV       | AMC                | 81  | F   | 0.111                                   | 2.818                             | 0.314                                                                              | 25.3                                                                                 |
|             | IV       | AMC                | 82  |     | 0.121                                   | 3.190                             | 0.387                                                                              | 26.3                                                                                 |
| E           | IV       | AMC                | 87  | M   | 0.087                                   | 3.762                             | 0.328                                                                              | 43.2                                                                                 |
|             | IV       | AMC                | 88  |     | 0.089                                   | 4.312                             | 0.385                                                                              | 48.3                                                                                 |

**Supplementary Table 1. Demographics and summary of biomarker values for participants with follow up visits.** Participant A-E had baseline and follow up visit 1 year apart. Participant A (PSP) was in quadrant I (amyloid-, ptau+) at baseline and follow up. Participant B-E were in quadrant IV (amyloid-, ptau-) at baseline and follow up.

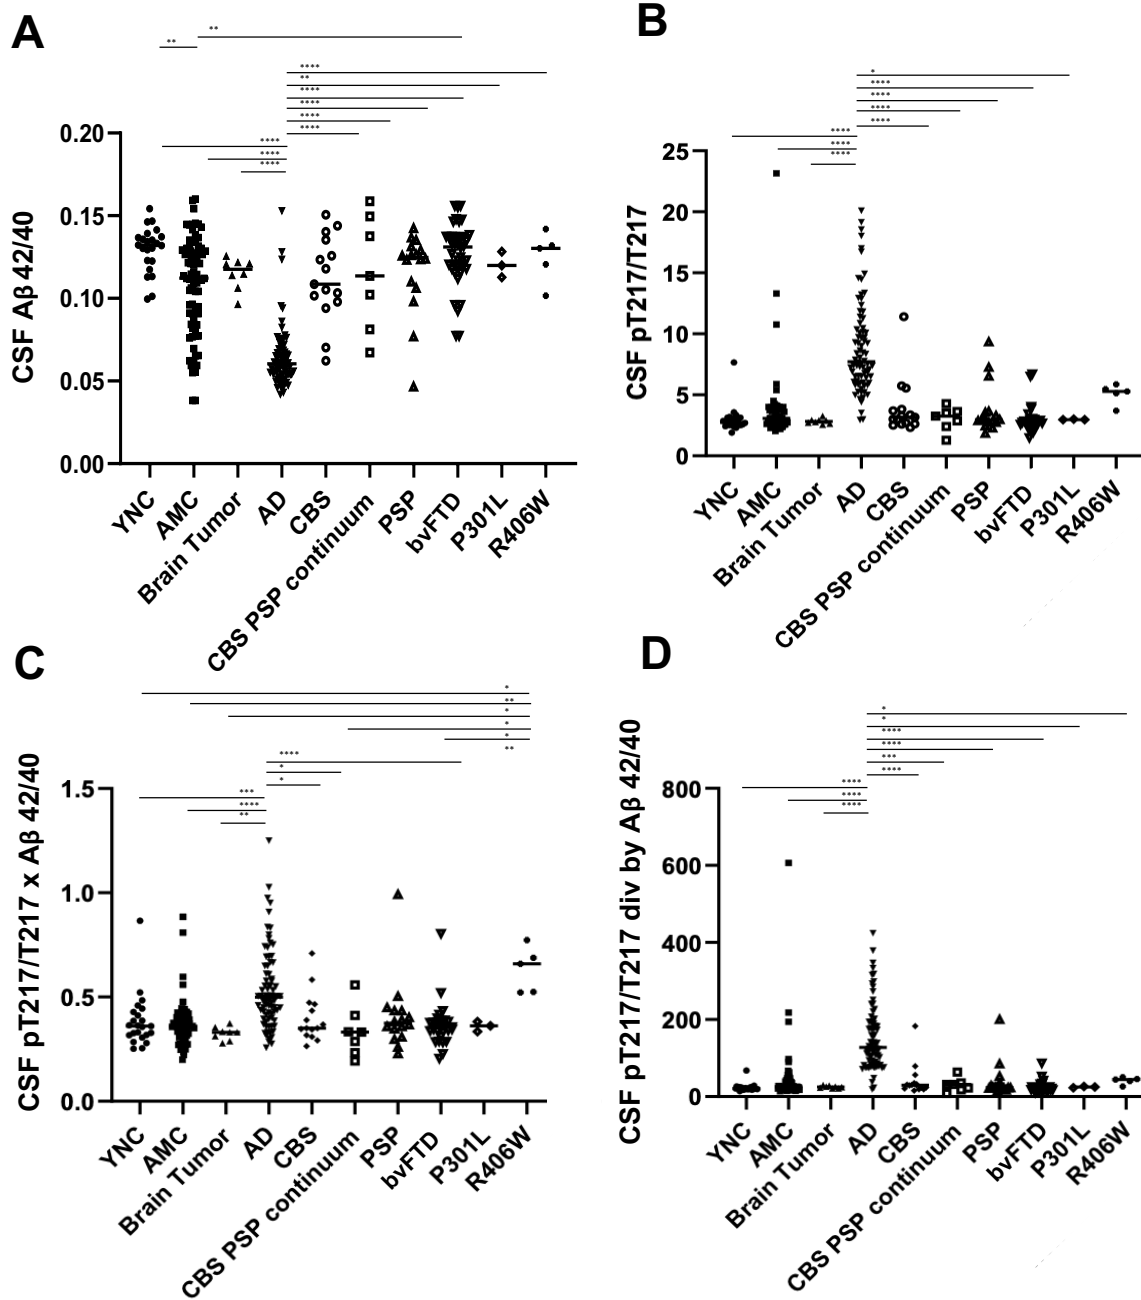

**Supplementary Fig. 7.** Subcategory of diagnosis are shown from Fig. 2. (A) CSF A $\beta$  42/40 is significantly decreased in AD and AD focal. (B) CSF pT217/T217 is significantly increased in AD and AD focal. (C) CSF pT217/T217 x CSF A $\beta$  42/40, is significantly increased in AD and MAPT R406W mutation carriers. (D) CSF pT217/T217 divided by CSF A $\beta$  42/40, is significantly increased in AD and AD focal. ANOVA \* $p < 0.05$ , \*\* $p < 0.01$ , \*\*\* $p < 0.001$ , \*\*\*\* $p < 0.0001$ .

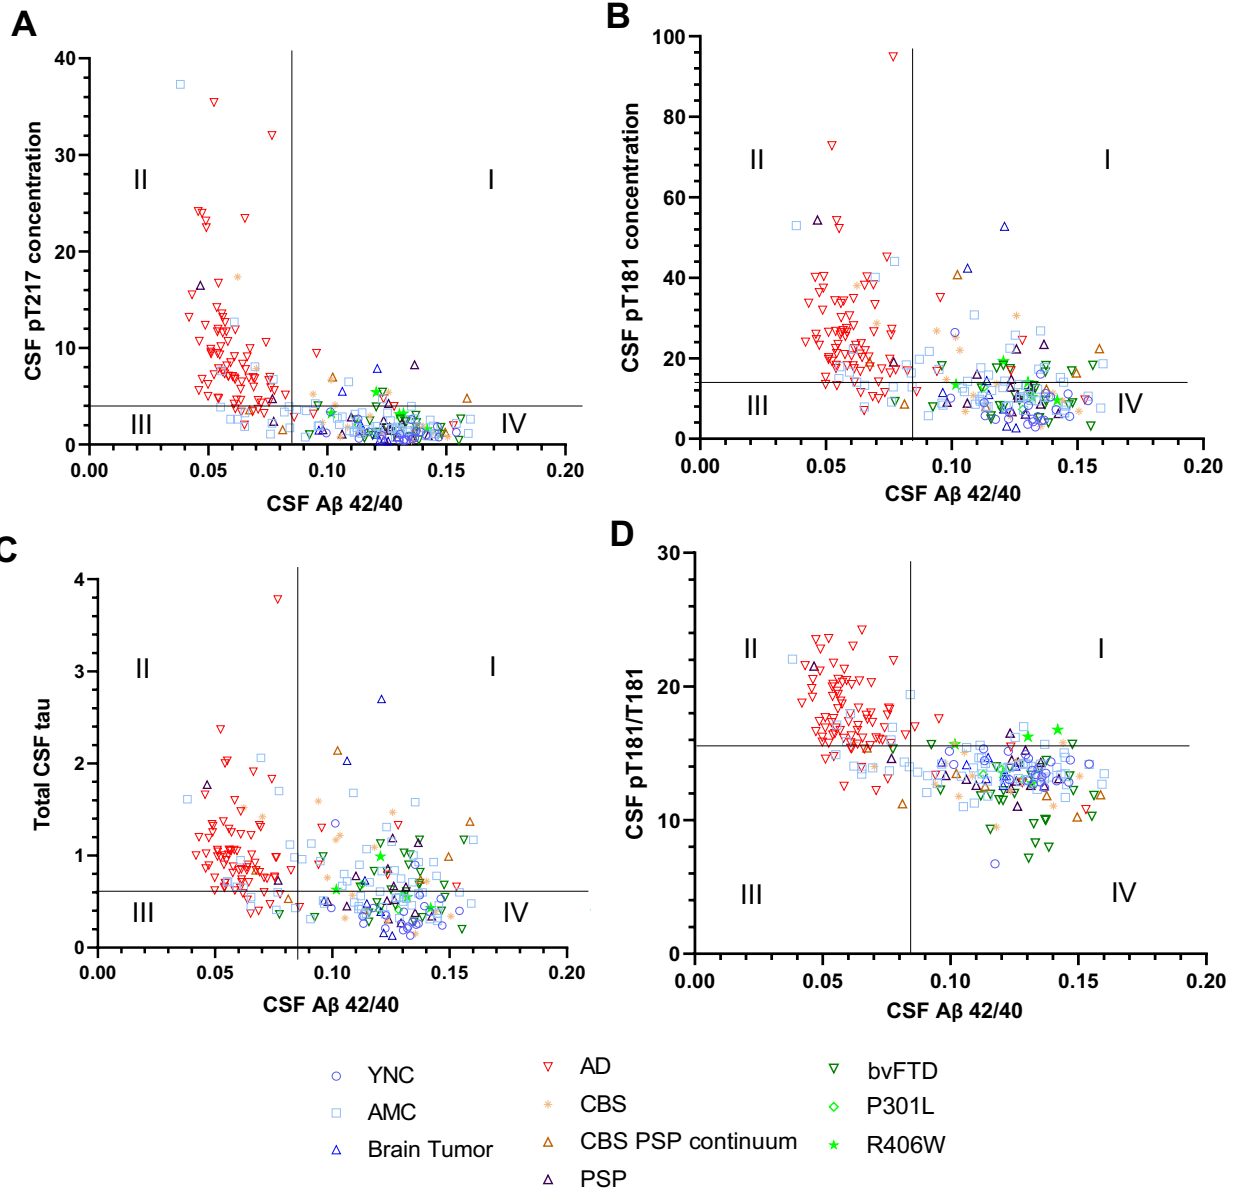

**Supplementary Fig. 8. Quadrant Analyses using CSF A $\beta$  42/40 and CSF total tau and ptau.**

CSF concentrations of pT217 (A), pT181 (B), total tau (C) do not separate *MAPT* R406W mutation carriers or other groups. (D) CSF pT181/T181 ratio does not separate *MAPT* R406W mutation carriers. However, sporadic bvFTD may have lower CSF pT181/T181 in quadrant IV.

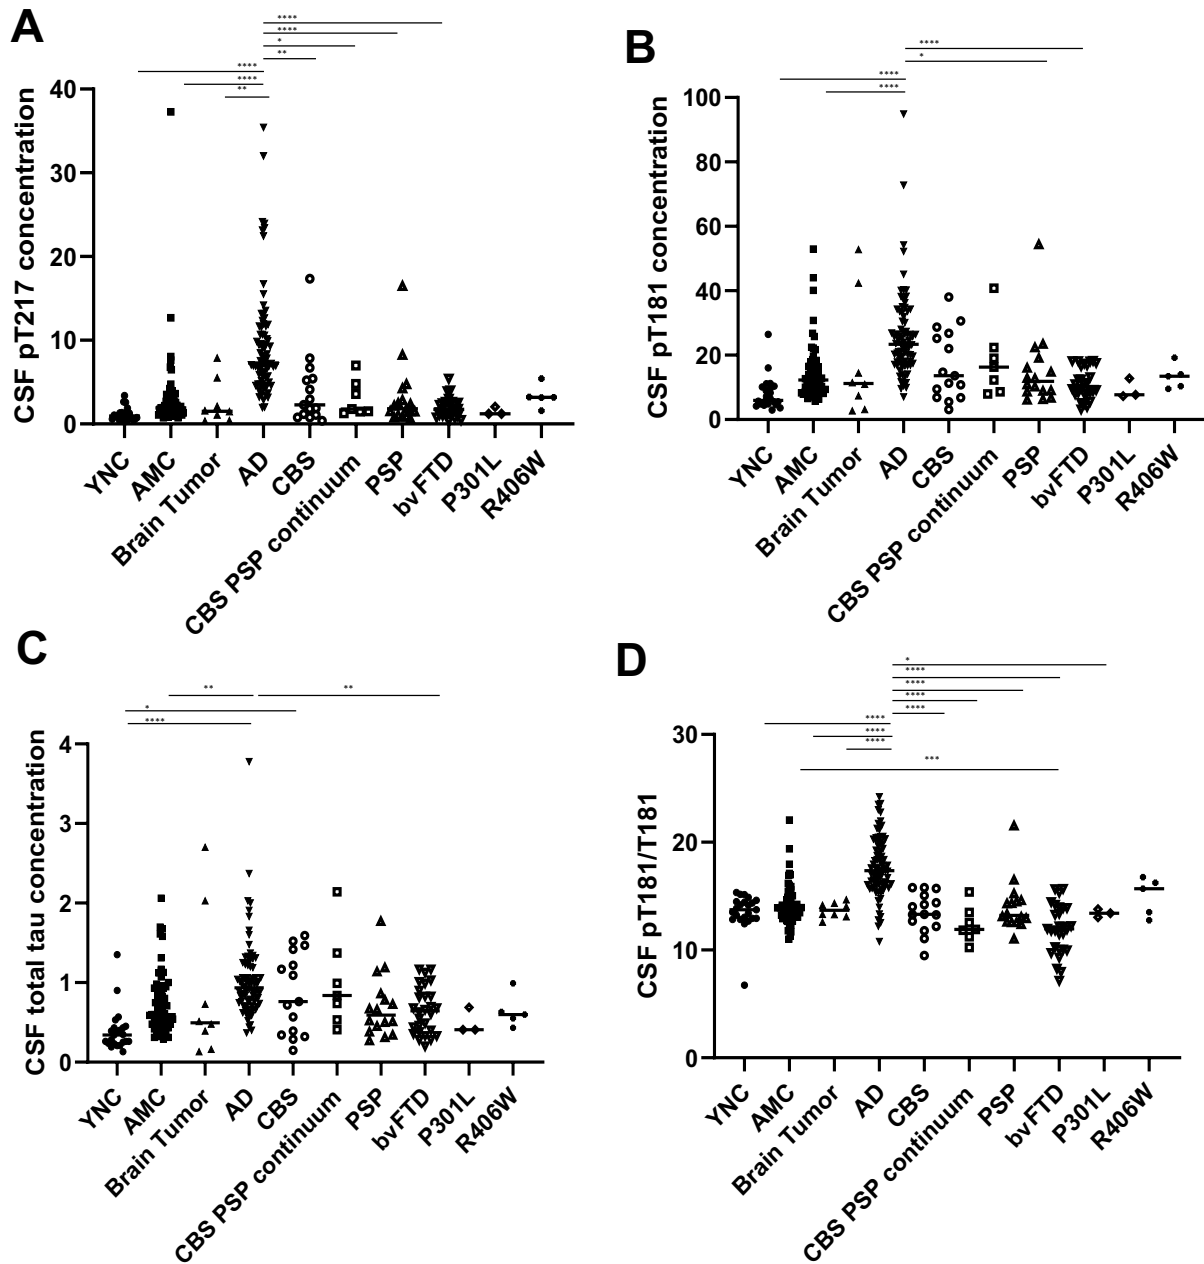

**Supplementary Fig. 9. IP/MS CSF total tau and ptau in subgroups of tauopathies.**

(A-B) AD has significantly increased CSF pT217 and pT181 concentrations. (C) Total CSF tau is significantly increased in AMC, AD, AD focal, CBS PSP continuum than YNC. (D) Sporadic bvFTD containing FTLD-tau, FTLD-TDP, FTLD-FUS has significantly lower CSF pT181/T181 than R406W (\* $p < 0.05$ ), AMC (\*\* $p < 0.001$ ), and AD/AD focal (\*\*\*\* $p < 0.0001$ ).

**A**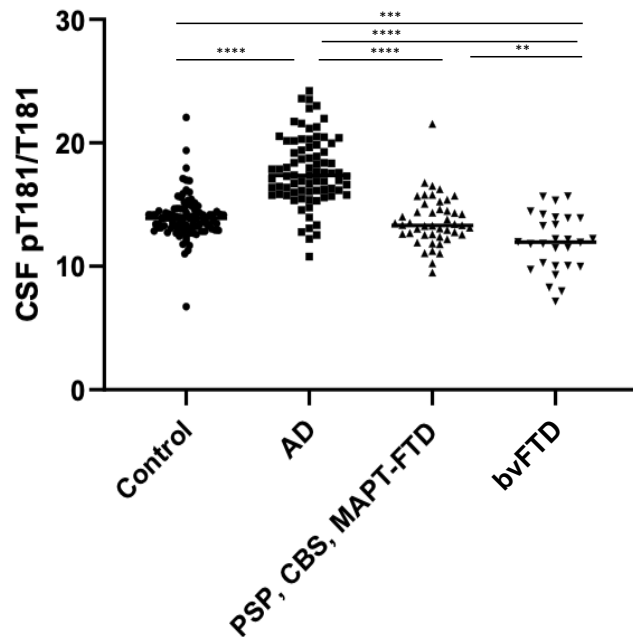**B**

| Test           | Diagnostic groups                     | n per group | AUC   | 95% CI           | P value |
|----------------|---------------------------------------|-------------|-------|------------------|---------|
| CSF pT181/T181 | bvFTD vs AD                           | 28 vs 80    | 0.959 | 0.9265 to 0.9913 | <0.0001 |
|                | PSP, CBS, <i>MAPT</i> -FTD vs AD      | 46 vs 80    | 0.894 | 0.8340 to 0.9540 | <0.0001 |
|                | AD vs Control                         | 80 vs 98    | 0.889 | 0.8325 to 0.9450 | <0.0001 |
|                | bvFTD vs Control                      | 28 vs 98    | 0.752 | 0.6295 to 0.8742 | <0.0001 |
|                | bvFTD vs PSP, CBS, <i>MAPT</i> -FTD   | 28 vs 46    | 0.707 | 0.5810 to 0.8336 | 0.0029  |
|                | PSP, CBS, <i>MAPT</i> -FTD vs Control | 46 vs 98    | 0.568 | 0.4582 to 0.6784 | 0.1869  |

**Supplementary Fig. 10. Sporadic bvFTD containing FTL $\Delta$ -tau, FTL $\Delta$ -TDP, FTL $\Delta$ -FUS may be separated from Control, AD and other tauopathies with CSF pT181/T181.** (A) Sporadic bvFTD (bvFTD) containing FTL $\Delta$ -tau, FTL $\Delta$ -TDP, FTL $\Delta$ -FUS has higher CSF A $\beta$  42/40 ratio and lower CSF pT181/T181 than Control, AD, and tauopathies containing CBS, PSP, and *MAPT*-FTD (P301L and R406W mutation carriers). \* $p$ <0.05, \*\* $p$ <0.01, \*\*\* $p$ <0.001, \*\*\*\* $p$ <0.0001. (B) Diagnostic values of CSF pT181/T181 in separating bvFTD from other cohort. Sporadic bvFTD can be separated from Control (AUC = 0.752) and PSP, CBS, and *MAPT*-FTD (AUC = 0.707).
